# Supplementary material for: Years of Life Lost due to exposure: Causal concepts and empirical shortcomings
Source: Springer Nature journal article supplement (doi:10.1186/1742-5573-1-5), 2004-12-16
Supplement: Additional file 1 [file 1742-5573-1-5-s1.pdf]

Table 1: Life table analysis with calculation of excess Years of Potential Life Lost e-YPLL according to Park et al. 2002. Basic data (unexposed) from BEIR IV (1988), Table 2A-10, p. 133: death rates of the male US population, surviving at least 30 years, applied to a birth cohort of 100,000. Exposure impact: advancement of certain fractions of deaths. For details of assumed mechanism see Table 2.

| Age<br>in years | Population<br>unexposed | No of Deaths<br>unexposed | Life Expectation at Death<br>in years, unexposed | Population<br>exposed | No of Deaths<br>exposed | Excess Deaths | e-YPLL    |
|-----------------|-------------------------|---------------------------|--------------------------------------------------|-----------------------|-------------------------|---------------|-----------|
| 0-4             | 95218.73                | 0.00                      | 70.35                                            | 95218.73              | 0.00                    | 0.00          | 0.00      |
| 5-9             | 95218.73                | 0.00                      | 65.35                                            | 95218.73              | 0.00                    | 0.00          | 0.00      |
| 10-14           | 95218.73                | 0.00                      | 60.35                                            | 95218.73              | 0.00                    | 0.00          | 0.00      |
| 15-19           | 95218.73                | 0.00                      | 55.35                                            | 95218.73              | 0.00                    | 0.00          | 0.00      |
| 20-24           | 95218.73                | 0.00                      | 50.35                                            | 95218.73              | 0.00                    | 0.00          | 0.00      |
| 25-29           | 95218.73                | 0.00                      | 45.35                                            | 95218.73              | 528.35                  | 528.35        | 23961.01  |
| 30-34           | 95218.73                | 928.35                    | 40.75                                            | 94690.38              | 948.62                  | 25.42         | 1035.71   |
| 35-39           | 94290.38                | 1148.62                   | 36.19                                            | 93741.76              | 1381.04                 | 239.10        | 8652.82   |
| 40-44           | 93141.76                | 1681.04                   | 31.76                                            | 92360.73              | 2532.44                 | 865.50        | 27489.94  |
| 45-49           | 91460.73                | 2632.44                   | 27.56                                            | 89828.29              | 3090.71                 | 505.26        | 13922.40  |
| 50-54           | 88828.29                | 4090.71                   | 23.64                                            | 86737.58              | 5468.21                 | 1473.78       | 34846.00  |
| 55-59           | 84737.58                | 5968.21                   | 20.06                                            | 81269.37              | 6814.23                 | 1090.29       | 21867.40  |
| 60-64           | 78769.37                | 8314.23                   | 16.83                                            | 74455.14              | 9996.22                 | 2137.36       | 35978.90  |
| 65-69           | 70455.14                | 10996.22                  | 14.02                                            | 64458.92              | 12331.36                | 2270.99       | 31843.30  |
| 70-74           | 59458.92                | 13331.36                  | 11.63                                            | 52127.56              | 13391.34                | 1703.76       | 19813.20  |
| 75-79           | 46127.56                | 14391.34                  | 9.64                                             | 38736.22              | 14146.45                | 2061.13       | 19859.47  |
| 80-84           | 31736.22                | 13646.45                  | 8.13                                             | 24589.77              | 12521.41                | 1947.91       | 15840.18  |
| 85-89           | 18089.77                | 11021.41                  | 8.02                                             | 12068.36              | 7306.48                 | -46.31        | -371.19   |
| 90-94           | 7068.36                 | 4306.48                   | 7.72                                             | 4761.88               | 2882.71                 | -18.52        | -142.95   |
| 95-99           | 2761.88                 | 1682.71                   | 6.95                                             | 1879.17               | 1157.50                 | 12.59         | 87.55     |
| 100-104         | 1079.17                 | 657.50                    | 5.00                                             | 721.67                | 521.67                  | 81.99         | 409.93    |
| 105+            | 421.67                  | 421.67                    | 0.00                                             | 200.00                | 200.00                  | 0.00          | 0.00      |
| Total           |                         | 95218.73                  |                                                  |                       | 95218.73                |               | 255093.66 |
