# Supplementary material for: Years of Life Lost due to exposure: Causal concepts and empirical shortcomings
Source: Springer Nature journal article supplement (doi:10.1186/1742-5573-1-5), 2004-12-16
Supplement: Additional file 3 [file 1742-5573-1-5-s3.pdf]

Table 3: Life table analysis with calculation of excess Years of Potential Life Lost e-YPLL and true excess Years of Life Lost e-YLL for overall and lung cancer mortality (ICD9-162). Basic data (unexposed) from BEIR IV (1988), Table 2A-10, p. 133: overall and lung cancer death rates of the male US population, surviving at least 30 years applied to a birth cohort of 100,000. Exposure impact: advancement of factual and hypothetical lung cancer deaths by 5 years, mixture of advancements among deaths from all causes. It is assumed that the advancement of hypothetical lung cancer deaths leads to an excess of 50% of lung cancer deaths among exposed in each age category. The overall e-YLL for lung cancer are less than the number of exposed lung cancer deaths times 5 years. The e-YPLL for overall death and lung cancer death are determined according to Park et al. 2002. For all deaths e-YPLL must equal e-YLL, but e-YPLL is obviously biased for lung cancer death.

| Age in years | Population unexposed | No of Deaths unexposed | No of Deaths ICD9-162 unexposed | Life Expectation at Death in years, unexposed | Population exposed | No of Deaths exposed | No of Deaths ICD9-162 exposed | Excess Deaths overall | e-YPLL overall | Excess Deaths ICD9-162 | e-YPLL ICD9-162 |
|--------------|----------------------|------------------------|---------------------------------|-----------------------------------------------|--------------------|----------------------|-------------------------------|-----------------------|----------------|------------------------|-----------------|
| 0-4          | 95218.73             | 0.00                   | 0.00                            | 70.35                                         | 95218.73           | 0.00                 | 0.00                          | 0.00                  | 0.00           | 0.00                   | 0.00            |
| 5-9          | 95218.73             | 0.00                   | 0.00                            | 65.35                                         | 95218.73           | 0.00                 | 0.00                          | 0.00                  | 0.00           | 0.00                   | 0.00            |
| 10-14        | 95218.73             | 0.00                   | 0.00                            | 60.35                                         | 95218.73           | 0.00                 | 0.00                          | 0.00                  | 0.00           | 0.00                   | 0.00            |
| 15-19        | 95218.73             | 0.00                   | 0.00                            | 55.35                                         | 95218.73           | 0.00                 | 0.00                          | 0.00                  | 0.00           | 0.00                   | 0.00            |
| 20-24        | 95218.73             | 0.00                   | 0.00                            | 50.35                                         | 95218.73           | 0.00                 | 0.00                          | 0.00                  | 0.00           | 0.00                   | 0.00            |
| 25-29        | 95218.73             | 0.00                   | 0.00                            | 45.35                                         | 95218.73           | 320.53               | 8.81                          | 320.53                | 14536.23       | 8.81                   | 399.63          |
| 30-34        | 95218.73             | 928.35                 | 5.87                            | 40.75                                         | 94898.20           | 1350.00              | 40.70                         | 424.77                | 17308.67       | 34.84                  | 1419.69         |
| 35-39        | 94290.38             | 1148.62                | 27.13                           | 36.19                                         | 93548.20           | 1736.00              | 133.26                        | 596.42                | 21583.84       | 106.34                 | 3848.29         |
| 40-44        | 93141.76             | 1681.04                | 88.84                           | 31.76                                         | 91812.20           | 2189.00              | 335.04                        | 531.96                | 16896.10       | 247.47                 | 7860.26         |
| 45-49        | 91460.73             | 2632.44                | 223.36                          | 27.56                                         | 89623.20           | 3379.00              | 659.41                        | 799.45                | 22028.89       | 440.53                 | 12138.88        |
| 50-54        | 88828.29             | 4090.71                | 439.60                          | 23.64                                         | 86244.20           | 4670.00              | 1046.55                       | 698.29                | 16510.35       | 619.74                 | 14652.98        |
| 55-59        | 84737.58             | 5968.21                | 697.70                          | 20.06                                         | 81574.20           | 7259.00              | 1475.07                       | 1513.59               | 30357.36       | 803.41                 | 16113.64        |
| 60-64        | 78769.37             | 8314.23                | 983.38                          | 16.83                                         | 74315.20           | 11215.00             | 1771.61                       | 3370.92               | 56743.68       | 843.84                 | 14204.64        |
| 65-69        | 70455.14             | 10996.22               | 1181.07                         | 14.02                                         | 63100.20           | 12710.00             | 1802.55                       | 2861.70               | 40125.99       | 744.77                 | 10442.97        |
| 70-74        | 59458.92             | 13331.36               | 1201.70                         | 11.63                                         | 50390.20           | 14470.00             | 1434.54                       | 3171.95               | 36887.01       | 416.12                 | 4839.13         |
| 75-79        | 46127.56             | 14391.34               | 956.36                          | 9.64                                          | 35920.20           | 13860.00             | 862.89                        | 2653.25               | 25564.68       | 118.16                 | 1138.47         |
| 80-84        | 31736.22             | 13646.45               | 575.26                          | 8.13                                          | 22060.20           | 10250.00             | 323.71                        | 764.20                | 6214.40        | -76.16                 | -619.29         |
| 85-89        | 18089.77             | 11021.41               | 215.81                          | 8.02                                          | 11810.20           | 8134.00              | 126.49                        | 938.49                | 7522.35        | -14.41                 | -115.48         |
| 90-94        | 7068.36              | 4306.48                | 84.32                           | 7.72                                          | 3676.20            | 2150.00              | 49.42                         | -89.77                | -692.76        | 5.57                   | 42.96           |
| 95-99        | 2761.88              | 1682.71                | 32.95                           | 6.95                                          | 1526.20            | 880.00               | 19.31                         | -49.86                | -346.69        | 1.10                   | 7.68            |
| 100-104      | 1079.17              | 657.50                 | 12.87                           | 5.00                                          | 1070.00            | 412.20               | 12.39                         | -239.71               | -1198.55       | -0.38                  | -1.90           |
| 105+         | 421.67               | 421.67                 | 8.26                            | 0.00                                          | 657.80             | 234.00               | 0.00                          | -423.80               | 0.00           | -12.88                 | 0.00            |
| Total        |                      | 95218.73               | 6734.49                         |                                               |                    | 95218.73             | 10101.74                      | 17842.39              | 310041.56      | 4286.88                | 86372.55        |
|              |                      |                        |                                 |                                               |                    |                      |                               |                       |                | e-YLL <                | 50508.68        |
|              |                      |                        |                                 |                                               |                    |                      |                               |                       |                | bias >                 | 35863.87        |
|              |                      |                        |                                 |                                               |                    |                      |                               |                       |                | relative bias / % >    | 71.01           |
